# Supplementary material
Source: PubMed Central journal article supplement (PMC6166775)
Supplement: NIHMS77850-supplement-Reporting_summary.pdf [file NIHMS77850-supplement-Reporting_summary.pdf]

## Reporting Summary

Nature Research wishes to improve the reproducibility of the work that we publish. This form provides structure for consistency and transparency in reporting. For further information on Nature Research policies, see [Authors & Referees](#) and the [Editorial Policy Checklist](#).

### Statistical parameters

When statistical analyses are reported, confirm that the following items are present in the relevant location (e.g. figure legend, table legend, main text, or Methods section).

n/a | Confirmed

- The exact sample size ( $n$ ) for each experimental group/condition, given as a discrete number and unit of measurement
- An indication of whether measurements were taken from distinct samples or whether the same sample was measured repeatedly
- The statistical test(s) used AND whether they are one- or two-sided  
*Only common tests should be described solely by name; describe more complex techniques in the Methods section.*
- A description of all covariates tested
- A description of any assumptions or corrections, such as tests of normality and adjustment for multiple comparisons
- A full description of the statistics including central tendency (e.g. means) or other basic estimates (e.g. regression coefficient) AND variation (e.g. standard deviation) or associated estimates of uncertainty (e.g. confidence intervals)
- For null hypothesis testing, the test statistic (e.g.  $F$ ,  $t$ ,  $r$ ) with confidence intervals, effect sizes, degrees of freedom and  $P$  value noted  
*Give  $P$  values as exact values whenever suitable.*
- For Bayesian analysis, information on the choice of priors and Markov chain Monte Carlo settings
- For hierarchical and complex designs, identification of the appropriate level for tests and full reporting of outcomes
- Estimates of effect sizes (e.g. Cohen's  $d$ , Pearson's  $r$ ), indicating how they were calculated
- Clearly defined error bars  
*State explicitly what error bars represent (e.g. SD, SE, CI)*

*Our web collection on [statistics for biologists](#) may be useful.*

### Software and code

Policy information about [availability of computer code](#)

#### Data collection

Animal Behavior:  
Audacity software (<http://www.audacityteam.org>)  
Matlab (R2015b, MathWorks) - custom script  
Ethovision XT 8 (Noldus Information Technology)  
ANY-maze (Stoelting Europe)

Histology and Microscopy:  
Pannoramic Viewer (3D HISTECH Ltd.)  
Developer XD (Definiens AG) - custom script  
Fiji ImageJ (<https://imagej.net/>)  
ZEN software (Carl Zeiss Microscopy GmbH)

Electrophysiology:  
Clampfit software (Molecular devices)

Neural Population Sequencing:  
STAR (Version 2.4.0d)  
TopHat (Version 2.0.9)  
HTSeq (Version 0.5.4p3)

edgeR (Version 3.7)

Calcium Imaging:  
NVista HD (Version 2, Inscopix)

## Data analysis

Statistics:  
GraphPad Prism® (Version 7, GraphPad Software Inc.)

For manuscripts utilizing custom algorithms or software that are central to the research but not yet described in published literature, software must be made available to editors/reviewers upon request. We strongly encourage code deposition in a community repository (e.g. GitHub). See the Nature Research [guidelines for submitting code & software](#) for further information.

## Data

Policy information about [availability of data](#)

All manuscripts must include a [data availability statement](#). This statement should provide the following information, where applicable:

- Accession codes, unique identifiers, or web links for publicly available datasets
- A list of figures that have associated raw data
- A description of any restrictions on data availability

The data that support the findings of this study (Fig. 1-5, Supplementary Fig. 3-5, 7-13) are available from the corresponding author upon reasonable request. Data Supporting Fig. 1,2 are from Allen Mouse Brain Connectivity Atlas (<http://connectivity.brain-map.org/>). For data Supporting Supplementary Fig. 6 are Accession Codes section.

## Field-specific reporting

Please select the best fit for your research. If you are not sure, read the appropriate sections before making your selection.

Life sciences       Behavioural & social sciences       Ecological, evolutionary & environmental sciences

For a reference copy of the document with all sections, see [nature.com/authors/policies/ReportingSummary-flat.pdf](http://nature.com/authors/policies/ReportingSummary-flat.pdf)

## Life sciences study design

All studies must disclose on these points even when the disclosure is negative.

|                 |                                                                                                                                                                                                                                                                                                                                        |
|-----------------|----------------------------------------------------------------------------------------------------------------------------------------------------------------------------------------------------------------------------------------------------------------------------------------------------------------------------------------|
| Sample size     | No statistical methods were used to predetermine sample sizes. Sample size were similar as reported in previous publications 4,31,59,60.                                                                                                                                                                                               |
| Data exclusions | Out of the SCH 23390 cohort, 9 out of 31 animals were excluded from the analysis due to misplaced or blocked infusion cannulae.                                                                                                                                                                                                        |
| Replication     | All methods used in the manuscript underwent rigorous testing for reproducibility when established. Histological, electrophysiological and imaging experiments were replicated. Behavioral experiments were replicated using different methodologies.                                                                                  |
| Randomization   | All animals and samples were randomly assigned to the experimental groups.                                                                                                                                                                                                                                                             |
| Blinding        | Data collection and analysis were not performed blind to the conditions of the experiments. Data was acquired, processed and analyzed by automated workflows, except Fig. 1e, f, Supplementary Fig. 3a, Supplementary Fig. 4a,b, Supplementary Fig. 5a,b, Supplementary Fig. 7a,b,c,d, Supplementary Fig. 10e, Supplementary Fig. 11b. |

## Reporting for specific materials, systems and methods

### Materials & experimental systems

| n/a                                 | Involvement in the study                                        |
|-------------------------------------|-----------------------------------------------------------------|
| <input checked="" type="checkbox"/> | <input type="checkbox"/> Unique biological materials            |
| <input type="checkbox"/>            | <input checked="" type="checkbox"/> Antibodies                  |
| <input type="checkbox"/>            | <input checked="" type="checkbox"/> Eukaryotic cell lines       |
| <input checked="" type="checkbox"/> | <input type="checkbox"/> Palaeontology                          |
| <input type="checkbox"/>            | <input checked="" type="checkbox"/> Animals and other organisms |
| <input checked="" type="checkbox"/> | <input type="checkbox"/> Human research participants            |

### Methods

| n/a                                 | Involvement in the study                           |
|-------------------------------------|----------------------------------------------------|
| <input checked="" type="checkbox"/> | <input type="checkbox"/> ChIP-seq                  |
| <input type="checkbox"/>            | <input checked="" type="checkbox"/> Flow cytometry |
| <input checked="" type="checkbox"/> | <input type="checkbox"/> MRI-based neuroimaging    |

## Antibodies

Antibodies used

Primary antibodies used:

mouse antibody to PKCδ (BD Biosciences, 610398 1:500, LOT: n/a)  
published results for immunohistochemistry in mouse

chicken antibody to TH (Abcam, ab 7963, 1:1000, LOT: 2387494)  
published results for immunohistochemistry in mouse

goat antibody to SST (Santa-Cruz, sc-7819, 1:500, LOT: n/a)  
antibody was tested rigorously for functionality in mouse central amygdala

rabbit antibody to DsRed (Living Colors, 632496; 1:1000; LOT: n/a, to optimize visualization of AAV::DIO-M3 and AAV::DIO-M4 expression, both tagged with mCherry fluorophore).  
published results for immunohistochemistry in mouse

Secondary antibodies used:

Thermo Fisher Scientific, 1:1000; Alexa Fluor

published results for immunohistochemistry; validated binding to primary mouse AB

Validation

Antibodies were pre-established published commercial antibodies.

## Eukaryotic cell lines

Policy information about [cell lines](#)

Cell line source(s)

NIH-3T3

Authentication

The identity of NIH-3T3 line has not been authenticated specifically

Mycoplasma contamination

The NIH-3T3 cell line has been tested for contamination

Commonly misidentified lines  
(See [ICLAC](#) register)

No commonly misidentified cell lines were used

## Animals and other organisms

Policy information about [studies involving animals](#); [ARRIVE guidelines](#) recommended for reporting animal research

Laboratory animals

Male C57BL/6J mice (1-4 months old, Charles River Laboratories)  
Male TH::Cre mice (1-4 months old, Jax #008601)  
Male PKCδ::GluCl-CRE BAC transgenic mice (1-4 months old, mmrrc #11559)  
Male SST-IRES-Cre mice (1-4 months old, Jax #13044)  
Rosa::loxP-STOP-loxP-td-Tomato (Jackson #007905) were crossed to either PKCδ::GluCl-CRE BAC transgenic mice or SST-IRES-Cre mice for double transgenic male offsprings  
TH::Cre mice were crossed to Male PKCδ::GluCl-CRE BAC transgenic mice for double transgenic male offsprings.

Wild animals

No wild animals were used

Field-collected samples

No field collected samples were used

## Flow Cytometry

Plots

Confirm that:

- The axis labels state the marker and fluorochrome used (e.g. CD4-FITC).
- The axis scales are clearly visible. Include numbers along axes only for bottom left plot of group (a 'group' is an analysis of identical markers).
- All plots are contour plots with outliers or pseudocolor plots.
- A numerical value for number of cells or percentage (with statistics) is provided.

Methodology

Sample preparation

D1R expression in CEI neurons (Supplementary Figure 6):  
PKCδ::Cre or SST::Cre mice were crossed to Rosa::loxP-STOP-loxP-td-Tomato animals and the offspring used for neural population sequencing. Males (2-5 months old) were decapitated, brains extracted on ice and 1mm thick brain sections cut in ice-cold Hibernate A Low Fluorescence solution (BrainBits). The central amygdala was extracted using biopsy punches (1mm

diameter; Integra Miltex) and enzymatically dissociated following standard procedure (Papain Dissociation System, Worthington Biochem). For each animal, the central amygdala was extracted once on each side and then pooled.

RNAi mediated knock-down efficiency (Supplementary Figure 10):  
NIH-3T3 cells were stably transfected with a construct expressing a td-Tomato transgene harboring target sites of D1R and several control shRNAs in its 3'UTR. These cells were transduced with ASGE vectors harboring either D1R or control shRNAs. Cells were finally collected and td-Tomato reporter knockdown in GFP-shRNA expressing cells was quantified using flow cytometry.

Instrument

BD FACSAria III

Software

BD FACSDiVa Software

Cell population abundance

D1R expression in CEI neurons (Supplementary Figure 6):

Approximately 1000 td-Tomato+ cells were retrieved with FACS sorting.  
Proportionally, SST-cre/tdTomato and PKCd-cre/tdTomato mice yielded approximately 20% positive cells. Note that these numbers underestimate the typical fraction of PKCd+ and SST+ cells in CEA, as conservative gating settings were used, to restrict sampling to unambiguously identified positive cells.

RNAi mediated knock-down efficiency (Supplementary Figure 10):  
Abundance and post-sort fractions are described in Supplementary Figure 8

Gating strategy

D1R expression in CEI neurons (Supplementary Figure 6) :

1st gate: FSC-A vs. SSC-A

2nd gate: FSC-A vs. FSC-W - singlet/aggregate separation.

3rd gate: mCherry (target channel - 610/20 nm) vs. PE-Cy7 (non-target channel - 780/60 nm) - positive/negative separation in aspect of mCherry, while avoiding high auto-fluorescent events.

RNAi mediated knock-down efficiency (Supplementary Figure 10):

1st gate: FSC-A vs. SSC-A

2nd gate: FSC-A vs. FSC-W - singlet/aggregate separation.

3rd gate: two channels, tdTomato (target channel - 610/20 nm) vs. GFP (non-target channel - 470/90 nm), were split into four groups: GFP pos/tdTomato neg, GFP pos/tdTomato pos, GFP neg/tdTomato pos, GFP neg/tdTomato neg

Tick this box to confirm that a figure exemplifying the gating strategy is provided in the Supplementary Information.
